# Supplementary material for: First Report of Potentially Pathogenic Klebsiella pneumoniae from Serotype K2 in Mollusk Tegillarca granosa and Genetic Diversity of Klebsiella pneumoniae in 14 Species of Edible Aquatic Animals
Source: Foods. 2022 Dec 15;11(24):4058. doi: 10.3390/foods11244058 (PMC9778296; doi:10.3390/foods11244058)
Supplement: Supplementary file 1 [file foods-11-04058-s001.zip › foods-1977138-supplementary.pdf]

## Supplementary Materials

**Table S1.** The 41 species of aquatic animals and the isolated *K. pneumoniae* strains.

| Aquatic Product | Species                            | Common Name               | No. of Isolates |
|-----------------|------------------------------------|---------------------------|-----------------|
| Fish            | <i>Aristichthys nobilis</i>        | Variegated carp           | 0               |
|                 | <i>Blotchy rock cod</i>            | Grouper                   | 6               |
|                 | <i>Carassius auratus</i>           | Crucian                   | 1               |
|                 | <i>Carassius auratus</i>           | Ditrema temmincki Bleeker | 0               |
|                 | <i>Channa argus</i>                | Snakeheaded fish          | 0               |
|                 | <i>Erythroculter ilishaeformis</i> | Topmouth culter           | 0               |
|                 | <i>Lctalurus punctatus</i>         | Channel catfish           | 0               |
|                 | <i>Lateolabrax japonicus</i>       | Perch                     | 0               |
|                 | <i>Misgurnus anguillicaudatus</i>  | Loach                     | 6               |
|                 | <i>Mylopharyngodon piceus</i>      | Black carp                | 0               |
|                 | <i>Nibeal albiflora</i>            | Spotted maigre            | 0               |
|                 | <i>Parabramis pekinensis</i>       | Bream                     | 0               |
|                 | <i>Pelteobagrus fulvidraco</i>     | Banded catfish            | 0               |
|                 | <i>Plectorhynchus cinctus</i>      | Grunt                     | 0               |
|                 | <i>Scophthalmus maximus</i>        | Turbot                    | 0               |
|                 | <i>Sparus berda</i>                | Yellowfin snapper         | 0               |
|                 | <i>Siniperca chuatsi</i>           | Mandarin fish             | 0               |
| Mollusks        | <i>Anodonta woodiana</i>           | Unionidae                 | 1               |
|                 | <i>Antigona lamellaris</i>         | Diagonal clam             | 0               |
|                 | <i>Atrina pectinata</i>            | Comb pen shell            | 0               |
|                 | <i>Azumapecten farreri</i>         | Farrer's scallop          | 0               |
|                 | <i>Babylonia areolata</i>          | Cowrie shell              | 1               |
|                 | <i>Babylonia formosae habei</i>    | Ivory shell               | 0               |
|                 | <i>Cipangopaludina cahayensis</i>  | Mudsnail                  | 30              |
|                 | <i>Haliotis rubra</i>              | Abalone                   | 5               |
|                 | <i>Mactra antiquata</i>            | Mussel                    | 13              |
|                 | <i>Mactra veneriformis</i>         | White clam seed           | 2               |
|                 | <i>Moerella iridescens</i>         | Sea-pumpkin seeds         | 0               |
|                 | <i>Mytilus edulis</i>              | Mussel                    | 0               |
|                 | <i>Neptunea cumingi Crosse</i>     | Sea snail                 | 2               |
|                 | <i>Ostrea gigas thunberg</i>       | Oyster                    | 0               |
|                 | <i>Pseudocardium sachalinense</i>  | Arctic surf clam          | 0               |
|                 | <i>Saxidomus purpuratus</i>        | Sowerby                   | 0               |
|                 | <i>Scapharca subcrenata</i>        | Ark shell                 | 0               |
|                 | <i>Sinonovacula constricta</i>     | Razor clam                | 0               |
|                 | <i>Solen strictus</i>              | Razor clam                | 3               |
|                 | <i>Spisula solidissima</i>         | Golden scallop            | 0               |
|                 | <i>Tegillarca granosa</i>          | Blood cockle              | 3               |
| Crustaceans     | <i>Eriocheir sinensis</i>          | Chinese mitten crab       | 6               |
|                 | <i>Penaeus vannamei</i>            | Whiteshrimp               | 0               |
|                 | <i>Procambarus clarkii</i>         | Crayfish                  | 15              |

**Table S2.** The oligonucleotide primers used in this study.

| Gene              | Primer               | Sequence (5'→3')            | Amplicon Size (bp) | Elongation Time (min) | Annealing Temperature (°C) | Reference |
|-------------------|----------------------|-----------------------------|--------------------|-----------------------|----------------------------|-----------|
| 16S rRNA          | 27-F                 | AGAGTTTGATCCTGGCTCAG        | 1540               | 2                     | 52                         | [75]      |
|                   | 1429-R               | TACGGCTACCTTGTTACGAC        |                    |                       |                            |           |
| <i>aerobactin</i> | <i>aerobactin</i> -F | GTGCTGTCGATGAGCGATGC        | 944                | 1                     | 55                         | [36]      |
|                   | <i>aerobactin</i> -R | GTGAGCCAGGTTTCAGCGTC        |                    |                       |                            |           |
| <i>alls</i>       | <i>alls</i> -F       | CATTACGCACCTTTGTCAGC        | 764                | 1                     | 60                         | [76]      |
|                   | <i>alls</i> -R       | GAATGTGTCGGCGATCAGCTT       |                    |                       |                            |           |
| <i>entB</i>       | <i>entB</i> -F       | ATTTCTCAACTTCTGGGGC         | 371                | 1                     | 57                         | [37]      |
|                   | <i>entB</i> -R       | AGCATCGGTGGCGGTGGTCA        |                    |                       |                            |           |
| <i>fimH</i>       | <i>fimH</i> -F       | TACTGCTGATGGGCTGGTC         | 640                | 1                     | 50                         | [37]      |
|                   | <i>fimH</i> -R       | GCCGGAGAGGTAATACCCC         |                    |                       |                            |           |
| <i>iroN</i>       | <i>iroN</i> -F       | AAGTCAAAGCAGGGGTTGCCCG      | 665                | 1                     | 63                         | [38]      |
|                   | <i>iroN</i> -R       | GACGCCGACATTAAGACGCAG       |                    |                       |                            |           |
| <i>magA</i> (K1)  | <i>magA</i> -F       | GGTGCTCTTTACATCATTGC        | 1283               | 2                     | 59                         | [39]      |
|                   | <i>magA</i> -R       | GCAATGGCCATTTGCGTTAG        |                    |                       |                            |           |
| <i>mrkD</i>       | <i>mrkD</i> -F       | CCACCAACTATTCCTCGAA         | 240                | 1                     | 60                         | [40]      |
|                   | <i>mrkD</i> -R       | ATGGAACCCACATCGACATT        |                    |                       |                            |           |
| <i>rmpA</i>       | <i>rmpA</i> -F       | ACTGGGCTACCTCTGCTTCA        | 535                | 1                     | 61                         | [15]      |
|                   | <i>rmpA</i> -R       | CTTGCAATGAGCCATCTTTCA       |                    |                       |                            |           |
| <i>traT</i>       | <i>traT</i> -F       | GGTGTGGTGCGATGAGCACAG       | 290                | 1                     | 63                         | [38]      |
|                   | <i>traT</i> -R       | CACGGTTCAGCCATCCCTGAG       |                    |                       |                            |           |
| <i>wcaG</i>       | <i>wcaG</i> -F       | GGTTGGTCAGCAATCGTA          | 169                | 1                     | 57                         | [9]       |
|                   | <i>wcaG</i> -R       | ACTATTCCGCCAACTTTTGC        |                    |                       |                            |           |
| <i>ybtA</i>       | <i>ybtA</i> -F       | ATGACGGAGTCACCGCAAAC        | 950                | 1                     | 53                         | [41]      |
|                   | <i>ybtA</i> -R       | TTACATCACGCGTTTAAAGG        |                    |                       |                            |           |
| K2                | K2-F                 | GACCCGATATTCATACCTTGACAGAG  | 641                | 1                     | 58                         | [9]       |
|                   | K2-R                 | CCTGAAGTAAAATCGTAAATAGATGGC |                    |                       |                            |           |
| K5                | K5-F                 | TGGTAGTGATGCTCGCGA          | 280                | 1                     | 60                         | [9]       |
|                   | K5-R                 | CCTGAACCCACCCCAATC          |                    |                       |                            |           |
| K20               | K20-F                | CGGTGCTACAGTGCATCATT        | 741                | 1                     | 58                         | [9]       |
|                   | K20-R                | GTTATACGATGCTCAGTCGC        |                    |                       |                            |           |
| K54               | K54-F                | CATTAGCTCAGTGGTTGGCT        | 881                | 1                     | 62                         | [9]       |
|                   | K54-R                | GCTTGACAAACACCATAGCAG       |                    |                       |                            |           |
| K57               | K57-F                | CTCAGGGCTAGAAGTGTCTAT       | 1037               | 2                     | 61                         | [9]       |
|                   | K57-R                | CACTAACCCAGAAAGTCGAG        |                    |                       |                            |           |
| ERIC              | ERIC1R               | ATGTAAGCTCCTGGGGATTAC       |                    |                       |                            | [42]      |
|                   | ERIC2                | AAGTAAGTGACTGGGGTGAGCG      |                    |                       |                            |           |

**Table S3.** The sequenced 16S rRNA and virulence-related genes in the representative *K. pneumoniae* isolates.

| <i>K. pneumoniae</i> Isolate | Gene        | NCBI Accession Number |
|------------------------------|-------------|-----------------------|
| 7-5-1                        | 16S rRNA    | OM816744              |
| 7-5-4                        | 16S rRNA    | OM816745              |
| 7-10-14                      | 16S rRNA    | OM816746              |
| 7-13-2                       | 16S rRNA    | OM816747              |
| 7-17-8                       | 16S rRNA    | OM816748              |
| 7-17-16                      | 16S rRNA    | OM816749              |
| 8-1-12-1                     | 16S rRNA    | OM816750              |
| 8-1-12-5                     | 16S rRNA    | OM816751              |
| 8-2-5-4                      | 16S rRNA    | OM816752              |
| 8-2-10-5                     | 16S rRNA    | OM816753              |
| 8-2-2-22                     | <i>entB</i> | OK546015              |
| 8-2-2-14                     | <i>entB</i> | OK546016              |
| 8-1-7-4                      | <i>entB</i> | OK546018              |
| 8-1-12-1                     | <i>entB</i> | OK576466              |
| 8-1-12-13                    | <i>entB</i> | OK576467              |
| 7-5-2                        | <i>entB</i> | OK576468              |
| 7-17-21                      | <i>entB</i> | OK576469              |
| 7-17-2                       | <i>entB</i> | OK576470              |
| 7-17-1                       | <i>entB</i> | OK576471              |
| 7-17-3                       | <i>entB</i> | OK576472              |
| 7-17-1                       | <i>fimH</i> | MZ366459              |
| 7-17-2                       | <i>mrkD</i> | MZ380316              |
| 7-17-6                       | <i>ybtA</i> | MZ380315              |
| 8-1-7-4                      | <i>ytbA</i> | OK546017              |

**Table S4.** The distribution of the *K. pneumoniae* strains in the aquatic animal samples originating from different regions and fish markets in China.

| Province/City | Species                                                                               | Fish Market                | No. of strain | Percentage (%) |
|---------------|---------------------------------------------------------------------------------------|----------------------------|---------------|----------------|
| Fujian        | <i>B. areolata</i> , <i>N. cumingi</i> Crosse, <i>S. strictus</i> , <i>T. granosa</i> | Luchao Port Aquatic Market | 8             | 8.51           |
| Hunan         | <i>M. antiquata</i>                                                                   | Jiangyang Aquatic Market   | 13            | 13.83          |
| Jiangsu       | <i>A. woodiana</i> , <i>H. rubra</i>                                                  | Jiangyang Aquatic Market   | 6             | 6.38           |
|               | <i>M. veneriformis</i>                                                                | Luchao Port Aquatic Market | 2             | 2.13           |
| Shandong      | <i>C. cahayensis</i>                                                                  | Luchao Port Aquatic Market | 30            | 31.91          |
| Shanghai      | <i>P. clarkii</i>                                                                     | Jiangyang Aquatic Market   | 15            | 15.96          |
|               | <i>E. sinensis</i>                                                                    | Luchao Port Aquatic Market | 6             | 6.38           |
| Zhejiang      | <i>B. rock cod</i> , <i>T. granosa</i>                                                | Jiangyang Aquatic Market   | 7             | 7.45           |
| Zhejiang      | <i>C. auratus</i> , <i>M. anguillicaudatus</i>                                        | Luchao Port Aquatic Market | 7             | 7.45           |

**Table S5.** Heavy metal tolerance of the 94 *K. pneumoniae* strains evaluated in this study.

| Heavy metal      | Number of isolates with a maximum observed MIC (µg/mL) |         |      |    |    |     |         |        |         |         |      | Resistance |      |
|------------------|--------------------------------------------------------|---------|------|----|----|-----|---------|--------|---------|---------|------|------------|------|
|                  | 3.125                                                  | 6.25    | 12.5 | 25 | 50 | 100 | 200     | 400    | 800     | 1600    | 3200 | No.        | (%)  |
| Cd <sup>2+</sup> |                                                        |         |      |    | 2  | 6   | a<br>55 | 28     | 3       |         |      | 31         | 33.0 |
| Cr <sup>3+</sup> |                                                        |         |      |    |    |     |         | 1      | a<br>2  | 55      | 36   | 91         | 96.8 |
| Cu <sup>2+</sup> |                                                        |         |      |    |    |     |         | a<br>3 | 14      | 74      | 3    | 91         | 96.8 |
| Hg <sup>2+</sup> | 3                                                      | a<br>14 | 43   | 27 | 7  |     |         |        |         |         |      | 77         | 81.9 |
| Mn <sup>2+</sup> |                                                        |         |      |    |    |     | 1       | 3      | 19      | a<br>57 | 14   | 14         | 14.9 |
| Ni <sup>2+</sup> |                                                        |         |      |    |    |     | 20      | 43     | a<br>31 |         |      | 0          | 0    |
| Pb <sup>2+</sup> |                                                        |         |      |    |    |     | 1       | 1      | a<br>8  | 8       | 76   | 84         | 89.4 |
| Zn <sup>2+</sup> |                                                        |         |      |    |    |     | a<br>8  | 66     | 19      | 1       | 0    | 86         | 91.5 |

Note: a, the minimal inhibition concentration (MIC) of the quality control strain *E. coli* K12.

**Table S6.** The predicted virulence-related genes in the *K. pneumoniae* 8-2-5-4 genome.

| Gene ID  | Location   | VFDB ID   | Virulence Factor | Description                                                                                                    |
|----------|------------|-----------|------------------|----------------------------------------------------------------------------------------------------------------|
| gene4612 | Scaffold22 | VFG044322 | Sal              | A major trigger of inflammation and bacterial dissemination induced during <i>K. pneumoniae</i> lung infection |
| gene1449 | Scaffold3  | VFG048237 | Type I fimbriae  | Adhering to human mucosal or epithelial surfaces                                                               |
| gene1450 | Scaffold3  | VFG048247 |                  |                                                                                                                |
| gene1453 | Scaffold3  | VFG048277 |                  |                                                                                                                |
| gene1448 | Scaffold3  | VFG048229 |                  |                                                                                                                |
| gene1451 | Scaffold3  | VFG048257 |                  |                                                                                                                |
| gene1455 | Scaffold3  | VFG048297 |                  |                                                                                                                |
| gene1456 | Scaffold3  | VFG048307 |                  |                                                                                                                |
| gene1452 | Scaffold3  | VFG048267 |                  |                                                                                                                |
| gene1457 | Scaffold3  | VFG048317 | T6SS             | Antibacterial activity                                                                                         |
| gene1454 | Scaffold3  | VFG048287 |                  |                                                                                                                |
| gene3582 | Scaffold11 | VFG048784 |                  |                                                                                                                |
| gene3588 | Scaffold11 | VFG048740 |                  |                                                                                                                |
| gene5049 | Scaffold35 | VFG048683 |                  |                                                                                                                |
| gene5143 | Scaffold60 | VFG048639 |                  |                                                                                                                |
| gene3583 | Scaffold11 | VFG048776 |                  |                                                                                                                |
| gene5047 | Scaffold35 | VFG048661 |                  |                                                                                                                |
| gene5054 | Scaffold35 | VFG048732 |                  |                                                                                                                |
| gene3584 | Scaffold11 | VFG048767 |                  |                                                                                                                |
| gene5050 | Scaffold35 | VFG048693 |                  |                                                                                                                |
| gene5147 | Scaffold66 | VFG048628 |                  |                                                                                                                |
| gene5046 | Scaffold35 | VFG048650 |                  |                                                                                                                |
| gene5144 | Scaffold61 | VFG048639 |                  |                                                                                                                |
| gene3585 | Scaffold11 | VFG048758 |                  |                                                                                                                |
| gene5051 | Scaffold35 | VFG048704 |                  |                                                                                                                |
| gene5055 | Scaffold35 | VFG048723 |                  |                                                                                                                |
| gene5056 | Scaffold35 | VFG048723 |                  |                                                                                                                |
| gene3586 | Scaffold11 | VFG048751 |                  |                                                                                                                |

| Gene ID  | Location   | VFDB ID   | Virulence Factor | Description                                                                                                                                                                                                                                                                                                                                                                                                                                                           |
|----------|------------|-----------|------------------|-----------------------------------------------------------------------------------------------------------------------------------------------------------------------------------------------------------------------------------------------------------------------------------------------------------------------------------------------------------------------------------------------------------------------------------------------------------------------|
| gene0576 | Scaffold1  | VFG048683 | Capsule          | Assisting in evading the host immune system by protecting bacteria from opsonophagocytosis and serum killing                                                                                                                                                                                                                                                                                                                                                          |
| gene3589 | Scaffold11 | VFG048736 |                  |                                                                                                                                                                                                                                                                                                                                                                                                                                                                       |
| gene5053 | Scaffold35 | VFG048723 |                  |                                                                                                                                                                                                                                                                                                                                                                                                                                                                       |
| gene0261 | Scaffold1  | VFG048797 |                  |                                                                                                                                                                                                                                                                                                                                                                                                                                                                       |
| gene0262 | Scaffold1  | VFG048808 |                  |                                                                                                                                                                                                                                                                                                                                                                                                                                                                       |
| gene0277 | Scaffold1  | VFG048990 |                  |                                                                                                                                                                                                                                                                                                                                                                                                                                                                       |
| gene0264 | Scaffold1  | VFG048830 |                  |                                                                                                                                                                                                                                                                                                                                                                                                                                                                       |
| gene0263 | Scaffold1  | VFG048819 |                  |                                                                                                                                                                                                                                                                                                                                                                                                                                                                       |
| gene0275 | Scaffold1  | VFG048980 |                  |                                                                                                                                                                                                                                                                                                                                                                                                                                                                       |
| gene0276 | Scaffold1  | VFG048985 | Aerobactin       | Citrate-hydroxamate siderophore aerobactin is needed for successful infection by hypervirulent <i>K. pneumoniae</i> in pneumonic infections                                                                                                                                                                                                                                                                                                                           |
| gene0274 | Scaffold1  | VFG048972 |                  |                                                                                                                                                                                                                                                                                                                                                                                                                                                                       |
| gene4125 | Scaffold16 | VFG048606 |                  |                                                                                                                                                                                                                                                                                                                                                                                                                                                                       |
| gene4123 | Scaffold16 | VFG048600 |                  |                                                                                                                                                                                                                                                                                                                                                                                                                                                                       |
| gene4126 | Scaffold16 | VFG048609 |                  |                                                                                                                                                                                                                                                                                                                                                                                                                                                                       |
| gene4124 | Scaffold16 | VFG048603 | OmpA             | Contributes to brain microvascular endothelial cells (BMECs) invasion via a ligand-receptor interaction. Interaction of OmpA with its receptor induces actin condensation at the binding site. The actin reorganization induced by <i>E. coli</i> depends on activation of several host proteins involved in signaling, including focal adhesion kinase, PI3-kinase, PKC, and caveolin-1. OmpA also binds to C4b-binding protein, to avoid complement-mediated attack |
| gene4127 | Scaffold16 | VFG048621 |                  |                                                                                                                                                                                                                                                                                                                                                                                                                                                                       |
| gene3400 | Scaffold10 | VFG001443 | LOS              | Major immunogen. LOS phosphorylcholine (ChoP) may influence invasion via interaction with PAF receptor and stimulates of inflammatory signals. LPS phase variation is characterized by the spontaneous loss and gain of oligosaccharide structures present in the outer core. the phase variable expression of LPS biosynthesis genes promotes evasion of antigen-specific host immune defences and allow colonization of different host microenvironments            |
| gene0606 | Scaffold2  | VFG013465 |                  |                                                                                                                                                                                                                                                                                                                                                                                                                                                                       |
| gene1548 | Scaffold4  | VFG048488 | Ent              | May be necessary for penetration to deeper tissues                                                                                                                                                                                                                                                                                                                                                                                                                    |
| gene1551 | Scaffold4  | VFG048459 |                  |                                                                                                                                                                                                                                                                                                                                                                                                                                                                       |
| gene1544 | Scaffold4  | VFG048518 |                  |                                                                                                                                                                                                                                                                                                                                                                                                                                                                       |
| gene1555 | Scaffold4  | VFG048429 |                  |                                                                                                                                                                                                                                                                                                                                                                                                                                                                       |
| gene1549 | Scaffold4  | VFG048478 |                  |                                                                                                                                                                                                                                                                                                                                                                                                                                                                       |
| gene1550 | Scaffold4  | VFG048468 |                  |                                                                                                                                                                                                                                                                                                                                                                                                                                                                       |

| Gene ID  | Location   | VFDB ID   | Virulence Factor | Description                                                                                                                                    |
|----------|------------|-----------|------------------|------------------------------------------------------------------------------------------------------------------------------------------------|
| gene1556 | Scaffold4  | VFG048419 | AcrAB            | May mediate resistance against host-derived antimicrobial peptides; associated with antibiotic resistance                                      |
| gene1547 | Scaffold4  | VFG048498 |                  |                                                                                                                                                |
| gene1554 | Scaffold4  | VFG048439 |                  |                                                                                                                                                |
| gene1553 | Scaffold4  | VFG048449 |                  |                                                                                                                                                |
| gene1557 | Scaffold4  | VFG048409 |                  |                                                                                                                                                |
| gene1545 | Scaffold4  | VFG048508 |                  |                                                                                                                                                |
| gene1543 | Scaffold4  | VFG048528 |                  |                                                                                                                                                |
| gene2594 | Scaffold7  | VFG049133 | Type 3 fimbriae  | Mediating the formation of biofilms on biotic and abiotic surfaces                                                                             |
| gene2595 | Scaffold7  | VFG049144 |                  |                                                                                                                                                |
| gene2527 | Scaffold6  | VFG049144 |                  |                                                                                                                                                |
| gene1436 | Scaffold3  | VFG048327 |                  |                                                                                                                                                |
| gene1439 | Scaffold3  | VFG043623 |                  |                                                                                                                                                |
| gene1441 | Scaffold3  | VFG043625 |                  |                                                                                                                                                |
| gene1440 | Scaffold3  | VFG043624 |                  |                                                                                                                                                |
| gene1438 | Scaffold3  | VFG048348 | RcsAB            | RcsB combined with the unstable auxiliary regulator RcsA to bind to an RcsAB box in the promoter region to upregulate the cps genes expression |
| gene1442 | Scaffold3  | VFG043626 |                  |                                                                                                                                                |
| gene1437 | Scaffold3  | VFG048338 |                  |                                                                                                                                                |
| gene1443 | Scaffold3  | VFG043627 |                  |                                                                                                                                                |
| gene0400 | Scaffold1  | VFG049018 |                  |                                                                                                                                                |
| gene0156 | Scaffold1  | VFG049007 |                  |                                                                                                                                                |
| gene0258 | Scaffold1  | VFG049084 | LPS              | Resistant to serum complement. Also play a role in protecting bacteria from antimicrobial peptides, including polymyxin antibiotics            |
| gene0259 | Scaffold1  | VFG049095 |                  |                                                                                                                                                |
| gene0254 | Scaffold1  | VFG049040 |                  |                                                                                                                                                |
| gene0255 | Scaffold1  | VFG049051 |                  |                                                                                                                                                |
| gene0256 | Scaffold1  | VFG049062 |                  |                                                                                                                                                |
| gene0253 | Scaffold1  | VFG049029 |                  |                                                                                                                                                |
| gene0257 | Scaffold1  | VFG049073 |                  |                                                                                                                                                |
| gene4892 | Scaffold28 | VFG046465 | EF-Tu            | Surface-expressed elongation factor-Tu (EF-Tu) mediates attachment by interacting with host cell nucleolin                                     |
| gene4949 | Scaffold31 | VFG046465 |                  |                                                                                                                                                |
| gene2211 | Scaffold5  | VFG046465 |                  |                                                                                                                                                |
| gene5098 | Scaffold42 | VFG046465 |                  |                                                                                                                                                |

Note: VFDB, The virulence factor database (<http://www.mgc.ac.cn/VFs/main.htm>).

**Table S7.** The predicted antibiotic resistance-related genes in the *K. pneumoniae* 8-2-5-4 genome.

| Gene ID  | Location  | Gene        | CARD ID | Description                                                                                                                                                                                                                                                                                                                                                                                                                                                | Drug Class                    | Resistance Mechanism         |
|----------|-----------|-------------|---------|------------------------------------------------------------------------------------------------------------------------------------------------------------------------------------------------------------------------------------------------------------------------------------------------------------------------------------------------------------------------------------------------------------------------------------------------------------|-------------------------------|------------------------------|
| gene0291 | Scaffold1 | <i>mdtC</i> | 3000794 | MdtC is a transporter that forms a heteromultimer complex with MdtB to form a multidrug transporter. MdtBC is part of the MdtABC-TolC efflux complex. In the absence of MdtB, MdtC can form a homomultimer complex that results in a functioning efflux complex with a narrower drug specificity. <i>mdtC</i> corresponds to 3 loci in <i>Pseudomonas aeruginosa</i> PAO1 (gene name: <i>mxC/mxB</i> ) and 3 loci in <i>Pseudomonas aeruginosa</i> LESB58. | Aminocoumarin                 | Antibiotic efflux            |
| gene0290 | Scaffold1 | <i>mdtB</i> | 3000793 | MdtB is a transporter that forms a heteromultimer complex with MdtC to form a multidrug transporter. MdtBC is part of the MdtABC-TolC efflux complex.                                                                                                                                                                                                                                                                                                      | Aminocoumarin                 | Antibiotic efflux            |
| gene0294 | Scaffold1 | <i>baeR</i> | 3000828 | BaeR is a response regulator that promotes the expression of MdtABC and AcrD efflux complexes.                                                                                                                                                                                                                                                                                                                                                             | Aminocoumarin; aminoglycoside | Antibiotic efflux            |
| gene0194 | Scaffold1 | <i>MdtK</i> | 3001327 | A multidrug and toxic compound extrusions (MATE) transporter conferring resistance to norfloxacin, doxorubicin and acriflavine.                                                                                                                                                                                                                                                                                                                            | Fluoroquinolone               | Antibiotic efflux            |
| gene0394 | Scaffold1 | <i>YojI</i> | 3003952 | YojI mediates resistance to the peptide antibiotic microcin J25 when it is expressed from a multicopy vector. YojI is capable of pumping out microcin molecules. The outer membrane protein TolC in addition to YojI is required for export of microcin J25 out of the cell. Microcin J25 is thus the first known substrate for YojI.                                                                                                                      | Peptide                       | Antibiotic efflux            |
| gene0261 | Scaffold1 | <i>ugd</i>  | 3003577 | PmrE is required for the synthesis and transfer of 4-amino-4-deoxy-L-arabinose (Ara4N) to Lipid A, which allows gram-negative bacteria to resist the antimicrobial activity of cationic antimicrobial peptides and antibiotics such as polymyxin                                                                                                                                                                                                           | Peptide                       | Antibiotic target alteration |

| Gene ID  | Location  | Gene                      | CARD ID | Description                                                                                                                                                                                                                                                                                                                                                                                                                             | Drug Class                                                                                   | Resistance Mechanism |
|----------|-----------|---------------------------|---------|-----------------------------------------------------------------------------------------------------------------------------------------------------------------------------------------------------------------------------------------------------------------------------------------------------------------------------------------------------------------------------------------------------------------------------------------|----------------------------------------------------------------------------------------------|----------------------|
| gene0635 | Scaffold2 | <i>H-NS</i>               | 3000676 | H-NS is a histone-like protein involved in global gene regulation in Gram-negative bacteria. It is a repressor of the membrane fusion protein genes <i>acrE</i> , <i>mdtE</i> , and <i>emrK</i> as well as nearby genes of many RND-type multidrug exporters.                                                                                                                                                                           | Cephalosporin; cephamycin; fluoroquinolone; macrolide; penam; tetracycline                   | Antibiotic efflux    |
| gene1184 | Scaffold3 | <i>K. pneumoniae KpnG</i> | 3004588 | KpnG consists of ~390 residues and resembles EmrA of <i>E. coli</i> . Disruption of the pump components KpnG-KpnH significantly decrease resistance to azithromycin, ceftazidime, ciprofloxacin, ertapenem, erythromycin, gentamicin, imipenem, ticarcillin, norfloxacin, polymyxin-B, piperacillin, spectinomycin, tobramycin, and streptomycin                                                                                        | Aminoglycoside; carbapenem; cephalosporin; fluoroquinolone; macrolide; penam; penem; peptide | Antibiotic efflux    |
| gene1185 | Scaffold3 | <i>K. pneumoniae KpnH</i> | 3004597 | KpnH consists of ~511 residues, resembles EmrB of <i>E. coli</i> , and is probably a translocase in the KpnGH-TolC efflux protein in <i>K. pneumoniae</i> . Disruption of the pump components KpnG-KpnH significantly decrease resistance to azithromycin, ceftazidime, ciprofloxacin, ertapenem, erythromycin, gentamicin, imipenem, ticarcillin, norfloxacin, polymyxin-B, piperacillin, spectinomycin, tobramycin, and streptomycin. | Aminoglycoside; carbapenem; cephalosporin; fluoroquinolone; macrolide; penam; penem; peptide | Antibiotic efflux    |
| gene1140 | Scaffold3 | <i>oqxA</i>               | 3003922 | RND efflux pump conferring resistance to fluoroquinolone                                                                                                                                                                                                                                                                                                                                                                                | Diaminopyrimidine; fluoroquinolone; glycylicycline; nitrofurantoin; tetracycline             | Antibiotic efflux    |
| gene1141 | Scaffold3 | <i>oqxB</i>               | 3003923 | RND efflux pump conferring resistance to fluoroquinolone                                                                                                                                                                                                                                                                                                                                                                                | Diaminopyrimidine; fluoroquinolone; glycylicycline; nitrofurantoin; tetracycline             | Antibiotic efflux    |
| gene1183 | Scaffold3 | <i>emrR</i>               | 3000516 | EmrR is a negative regulator for the EmrAB-TolC multidrug efflux pump in <i>E. coli</i> . Mutations lead to EmrAB-TolC overexpression.                                                                                                                                                                                                                                                                                                  | Fluoroquinolone                                                                              | Antibiotic efflux    |

| Gene ID  | Location  | Gene                | CARD ID | Description                                                                                                                                                                                                                                                                                                                                                              | Drug Class                                                                                                                                                                           | Resistance Mechanism         |
|----------|-----------|---------------------|---------|--------------------------------------------------------------------------------------------------------------------------------------------------------------------------------------------------------------------------------------------------------------------------------------------------------------------------------------------------------------------------|--------------------------------------------------------------------------------------------------------------------------------------------------------------------------------------|------------------------------|
| gene1659 | Scaffold4 | <i>kdpE</i>         | 3003841 | kdpE is a transcriptional activator that is part of the two-component system KdpD/KdpE that is studied for its regulatory role in potassium transport and has been identified as an adaptive regulator involved in the virulence and intracellular survival of pathogenic bacteria. kdpE regulates a range of virulence loci through direct promoter binding.            | Aminoglycoside                                                                                                                                                                       | Antibiotic efflux            |
| gene1821 | Scaffold4 | <i>E. coli mdfA</i> | 3001328 | Multidrug efflux pump in <i>E. coli</i> . This multidrug efflux system was originally identified as the Cmr/CmlA chloramphenicol exporter.                                                                                                                                                                                                                               | Benzalkonium chloride; rhodamine; tetracycline                                                                                                                                       | Antibiotic efflux            |
| gene2192 | Scaffold5 | <i>CRP</i>          | 3000518 | CRP is a global regulator that represses MdtEF multidrug efflux pump expression.                                                                                                                                                                                                                                                                                         | Fluoroquinolone macrolide; penam                                                                                                                                                     | Antibiotic efflux            |
| gene2088 | Scaffold5 | <i>PmrF</i>         | 3003578 | PmrF is required for the synthesis and transfer of 4-amino-4-deoxy-L-arabinose (Ara4N) to Lipid A, which allows gram-negative bacteria to resist the antimicrobial activity of cationic antimicrobial peptides and antibiotics such as polymyxin. pmrF corresponds to 1 locus in <i>Pseudomonas aeruginosa</i> PAO1 and 1 locus in <i>Pseudomonas aeruginosa</i> LESB58. | Peptide                                                                                                                                                                              | Antibiotic target alteration |
| gene2306 | Scaffold6 | <i>TolC</i>         | 3000237 | TolC is a protein subunit of many multidrug efflux complexes in Gram negative bacteria. It is an outer membrane efflux protein and is constitutively open. Regulation of efflux activity is often at its periplasmic entrance by other components of the efflux complex.                                                                                                 | Aminocoumarin; aminoglycoside; carbapenem; cephalosporin; cephamycin; fluoroquinolone; glycylcycline; macrolide; penam; penem; peptide; phenicol; rifamycin; tetracycline; triclosan | Antibiotic efflux            |
| gene2527 | Scaffold6 | <i>AcrF</i>         | 3000502 | AcrF is a inner membrane transporter, similar to AcrB.                                                                                                                                                                                                                                                                                                                   | Cephalosporin; cephamycin; fluoroquinolone; penam                                                                                                                                    | Antibiotic efflux            |
| gene2319 | Scaffold6 | <i>bacA</i>         | 3002986 | The bacA gene product (BacA) recycles undecaprenyl pyrophosphate during cell wall biosynthesis which confers resistance to bacitracin.                                                                                                                                                                                                                                   | Peptide                                                                                                                                                                              | Antibiotic target alteration |

| Gene ID  | Location   | Gene                                             | CARD ID | Description                                                                                                                                                                                                                                                                                                                                                                                                                                                                              | Drug Class                                                                                          | Resistance Mechanism    |
|----------|------------|--------------------------------------------------|---------|------------------------------------------------------------------------------------------------------------------------------------------------------------------------------------------------------------------------------------------------------------------------------------------------------------------------------------------------------------------------------------------------------------------------------------------------------------------------------------------|-----------------------------------------------------------------------------------------------------|-------------------------|
| gene2594 | Scaffold7  | <i>K. pneumoniae</i> <i>acrA</i>                 | 3004041 | AcrA is a subunit of the AcrAB multidrug efflux system that in <i>K. pneumoniae</i> , which is encoded by the <i>acrRAB</i> operon.                                                                                                                                                                                                                                                                                                                                                      | Cephalosporin; fluoroquinolone; glycylicycline; penam; phenicol; rifamycin; tetracycline; triclosan | Antibiotic efflux       |
| gene2595 | Scaffold7  | <i>acrB</i>                                      | 3000216 | Protein subunit of AcrA-AcrB-TolC multidrug efflux complex. AcrB functions as a heterotrimer which forms the inner membrane component and is primarily responsible for substrate recognition and energy transduction by acting as a drug/proton antiporter.                                                                                                                                                                                                                              | Cephalosporin; fluoroquinolone; glycylicycline; penam; phenicol; rifamycin; tetracycline; triclosan | Antibiotic efflux       |
| gene2722 | Scaffold7  | <i>E. coli</i> <i>ampH</i><br><i>β-lactamase</i> | 3004612 | AmpH is a class C ampC-like $\beta$ -lactamase and penicillin-binding protein identified in <i>E. coli</i> .                                                                                                                                                                                                                                                                                                                                                                             | Cephalosporin; penam                                                                                | Antibiotic inactivation |
| gene3322 | Scaffold10 | <i>mdtH</i>                                      | 3001216 | Multidrug resistance protein MdtH                                                                                                                                                                                                                                                                                                                                                                                                                                                        | Fluoroquinolone                                                                                     | Antibiotic efflux       |
| gene3331 | Scaffold10 | <i>mdtG</i>                                      | 3001329 | The MdtG protein, also named YceE, appears to be a member of the major facilitator superfamily of transporters, and it has been reported, when overexpressed, to increase fosfomycin and deoxycholate resistances. <i>mdtG</i> is a member of the <i>marA</i> - <i>soxS</i> - <i>rob</i> regulon.                                                                                                                                                                                        | Fosfomycin                                                                                          | Antibiotic efflux       |
| gene3441 | Scaffold10 | <i>msbA</i>                                      | 3003950 | MsbA is a multidrug resistance transporter homolog from <i>E. coli</i> and belongs to a superfamily of transporters that contain an adenosine triphosphate (ATP) binding cassette (ABC) which is also called a nucleotide-binding domain (NBD). MsbA is a member of the MDR-ABC transporter group by sequence homology. MsbA transports lipid A, a major component of the bacterial outer cell membrane, and is the only bacterial ABC transporter that is essential for cell viability. | Nitroimidazole                                                                                      | Antibiotic efflux       |

| Gene ID  | Location   | Gene                                  | CARD ID | Description                                                                                                                                                                                                                                                                                                                                                                                                                                      | Drug Class                                                                                                                                    | Resistance Mechanism                                  |
|----------|------------|---------------------------------------|---------|--------------------------------------------------------------------------------------------------------------------------------------------------------------------------------------------------------------------------------------------------------------------------------------------------------------------------------------------------------------------------------------------------------------------------------------------------|-----------------------------------------------------------------------------------------------------------------------------------------------|-------------------------------------------------------|
| gene3555 | Scaffold11 | <i>K. pneumoniae</i><br><i>OmpK37</i> | 3004122 | <i>K. pneumoniae</i> outer membrane porin protein. Is preferentially detected in porin-deficient strains. Functional characterization of this new porin revealed a narrower pore than those of porins OmpK35 and OmpK36, which did not allow penetration by certain $\beta$ -lactams. Also, when a resistant strain expresses porin OmpK37 is less susceptible to cefotaxime and ceftazidime than when it is expressing either OmpK36 or OmpK35. | Carbapenem; cephalosporin; cephamycin; monobactam; penam; penem                                                                               | Reduced permeability to antibiotic                    |
| gene3602 | Scaffold12 | <i>FosA6</i>                          | 3004111 | <i>fosA6</i> is a plasmid-encoded enzyme that confers resistance to fosfomycin in <i>E. coli</i> by breaking the epoxide ring of the molecule.                                                                                                                                                                                                                                                                                                   | Fosfomycin                                                                                                                                    | Antibiotic inactivation                               |
| gene3912 | Scaffold14 | <i>acrD</i>                           | 3000491 | AcrD is an aminoglycoside efflux pump expressed in <i>E. coli</i> . Its expression can be induced by indole, and is regulated by baeRS and cpxAR.                                                                                                                                                                                                                                                                                                | Aminoglycoside                                                                                                                                | Antibiotic efflux                                     |
| gene4290 | Scaffold18 | <i>cpxA</i>                           | 3000830 | CpxA is a membrane-localized sensor kinase that is activated by envelope stress. It starts a kinase cascade that activates CpxR, which promotes efflux complex expression.                                                                                                                                                                                                                                                                       | Aminocoumarin; aminoglycoside                                                                                                                 | Antibiotic efflux                                     |
| gene4696 | Scaffold23 | <i>marA</i>                           | 3000263 | In the presence of antibiotic stress, <i>E. coli</i> overexpresses the global activator protein MarA, which besides inducing MDR efflux pump AcrAB, also down-regulates synthesis of the porin OmpF.                                                                                                                                                                                                                                             | Carbapenem; cephalosporin; cephamycin; fluoroquinolone; glycylcycline; monobactam; penam; penem; phenicol; rifamycin; tetracycline; triclosan | Antibiotic efflux; reduced permeability to antibiotic |
| gene4676 | Scaffold23 | <i>SHV-38</i>                         | 3001096 | SHV-38 is an extended-spectrum $\beta$ -lactamase found in <i>K. pneumoniae</i> .                                                                                                                                                                                                                                                                                                                                                                | Carbapenem; cephalosporin; penam                                                                                                              | Antibiotic inactivation                               |
| gene4731 | Scaffold24 | <i>ramA</i>                           | 3000823 | RamA (resistance antibiotic multiple) is a positive regulator of AcrAB-TolC and leads to high level multidrug resistance in <i>K. pneumoniae</i> , <i>Salmonella enterica</i> , and <i>Enterobacter aerogenes</i> , increasing the expression of both the mar operon as well as AcrAB. RamA also decreases OmpF expression.                                                                                                                      | Carbapenem; cephalosporin; cephamycin; fluoroquinolone; glycylcycline; monobactam; penam; penem; phenicol; rifamycin; tetracycline; triclosan | Antibiotic efflux; reduced permeability to antibiotic |

| Gene ID  | Location   | Gene                      | CARD ID | Description                                                                                                                                                                                                                                                                                                                                          | Drug Class                                                                 | Resistance Mechanism    |
|----------|------------|---------------------------|---------|------------------------------------------------------------------------------------------------------------------------------------------------------------------------------------------------------------------------------------------------------------------------------------------------------------------------------------------------------|----------------------------------------------------------------------------|-------------------------|
| gene4816 | Scaffold26 | <i>K. pneumoniae</i> KpnF | 3004583 | KpnF subunit of KpnEF resembles EbrAB from <i>E. coli</i> . Mutation in KpnEF resulted in increased susceptibility to cefepime, ceftriaxon, colistin, erythromycin, rifampin, tetracycline, and streptomycin as well as enhanced sensitivity toward sodium dodecyl sulfate, deoxycholate, dyes, benzalkonium chloride, chlorhexidine, and triclosan. | Aminoglycoside; cephalosporin; macrolide; peptide; rifamycin; tetracycline | Antibiotic efflux       |
| gene4815 | Scaffold26 | <i>K. pneumoniae</i> KpnE | 3004580 | KpnE subunit of KpnEF resembles EbrAB from <i>E. coli</i> . Mutation in KpnEF resulted in increased susceptibility to cefepime, ceftriaxon, colistin, erythromycin, rifampin, tetracycline, and streptomycin as well as enhanced sensitivity toward sodium dodecyl sulfate, deoxycholate, dyes, benzalkonium chloride, chlorhexidine, and triclosan  | Aminoglycoside; cephalosporin; macrolide; peptide; rifamycin; tetracycline | Antibiotic efflux       |
| gene5112 | Scaffold44 | <i>tet(A)</i>             | 3000165 | TetA is a tetracycline efflux pump found in many species of Gram-negative bacteria.                                                                                                                                                                                                                                                                  | Tetracycline                                                               | Antibiotic efflux       |
| gene5135 | Scaffold53 | <i>TEM-116</i>            | 3000979 | TEM-116 is a broad-spectrum $\beta$ -lactamase found in many species of bacteria.                                                                                                                                                                                                                                                                    | Cephalosporin; monobactam; penam; penem                                    | Antibiotic inactivation |

Note: CARD, The comprehensive antibiotic resistance database (<http://arpcard.Mcmaster.ca>).

**Table S8.** The prediction heavy metal resistance-related genes in the *K. pneumoniae* 8-2-5-4 genome.

| Gene ID  | Location  | BacMet ID | Gene             | Description                                                                                                                                                                                                                                                                          | Resistance to Heavy Metal |
|----------|-----------|-----------|------------------|--------------------------------------------------------------------------------------------------------------------------------------------------------------------------------------------------------------------------------------------------------------------------------------|---------------------------|
| gene0066 | Scaffold1 | BAC0252   | <i>mntP/yebN</i> | MntP; Functions as a manganese efflux pump                                                                                                                                                                                                                                           | Mn, Mg                    |
| gene0108 | Scaffold1 | BAC0465   | <i>znuC/yebM</i> | Zinc import ATP-binding protein ZnuC; part of the ABC transporter complex ZnuABC involved in zinc import. Responsible for energy coupling to the transport system. Transcriptionally repressed by zur (zinc uptake regulator), in response to high extracellular zinc concentrations | Zn                        |
| gene0109 | Scaffold1 | BAC0464   | <i>znuB/yebI</i> | High-affinity zinc uptake system membrane protein ZnuB; Involved in the high-affinity zinc uptake transport system; located in cell inner membrane                                                                                                                                   | Zn                        |
| gene0290 | Scaffold1 | BAC0646   | <i>mdtB</i>      | Multidrug resistance protein MdtB. Part of a tripartite efflux system composed of MdtA, MdtB and MdtC. MdtB forms a heteromultimer with MdtC. MdtABC multidrug efflux systems has a role in metal resistance.                                                                        | Zn                        |
| gene0291 | Scaffold1 | BAC0647   | <i>mdtC</i>      | Multidrug resistance protein MdtC. Part of a tripartite efflux system composed of MdtA, MdtB and MdtC. MdtB forms a heteromultimer with MdtC. MdtABC multidrug efflux systems has a role in metal resistance.                                                                        | Zn                        |
| gene0294 | Scaffold1 | BAC0596   | <i>baeR</i>      | Member of the two-component regulatory system BaeS/BaeR. Activates BaeR by phosphorylation which then activates the mdtABCD and probably the casABCDE-ygbT-ygbF operations.                                                                                                          | Cu, Zn, W                 |
| gene0595 | Scaffold2 | BAC0434   | <i>yehH</i>      | Stress protein YehH; response to Hydrogen Peroxide (H <sub>2</sub> O <sub>2</sub> ), cadmium; plays a role in bio-film formation as well                                                                                                                                             | Cd                        |
| gene0846 | Scaffold2 | BAC0707   | <i>sodB</i>      | Fe-dependent superoxide dismutase. Destroys superoxide anion radicals which are normally produced within the cells and which are toxic to biological systems.                                                                                                                        | Se                        |
| gene1252 | Scaffold3 | BAC0349   | <i>sitA</i>      | Iron/Mn transport protein, periplasmic-binding protein SitA; sitA gene encodes a periplasmic binding protein                                                                                                                                                                         | Mn, Fe                    |
| gene1253 | Scaffold3 | BAC0350   | <i>sitB</i>      | sitB encodes an ATP-binding protein                                                                                                                                                                                                                                                  | Mn, Fe                    |
| gene1254 | Scaffold3 | BAC0351   | <i>sitC</i>      | sitC encodes a permease (integral membrane protein); part of the sitABCD transport system                                                                                                                                                                                            | Mn, Fe                    |
| gene1467 | Scaffold3 | BAC0031   | <i>arsB</i>      | Arsenic pump membrane protein, located in cell inner membrane. Involved in arsenite and antimonite resistance. Thought to form a channel of an arsenite pump.                                                                                                                        | As, Sb                    |
| gene1628 | Scaffold4 | BAC0115   | <i>cutE/Int</i>  | Apolipoprotein N-acyltransferase, it attaches a fatty acid to apo-nlpE (cutF)                                                                                                                                                                                                        | Cu                        |
| gene1629 | Scaffold4 | BAC0088   | <i>corC</i>      | Magnesium and cobalt efflux protein CorC; Plays a role in the transport of magnesium and cobalt ions                                                                                                                                                                                 | Co, Mg                    |
| gene1714 | Scaffold4 | BAC0608   | <i>modE</i>      | Transcriptional regulator ModE. The ModE-Mo complex acts as a repressor of the modABC operon, involved in the transport of molybdate. It controls tungstate and molybdate homeostasis in bacteria.                                                                                   | W, Mo                     |
| gene1716 | Scaffold4 | BAC0609   | <i>modA</i>      | Molybdate-binding periplasmic protein. Involved in the transport of molybdenum into the cell. Binds molybdate with high specificity and affinity.                                                                                                                                    | W, Mo                     |
| gene1717 | Scaffold4 | BAC0610   | <i>modB</i>      | Molybdenum transport system permease protein ModB. Part of the binding-protein-dependent transport system for molybdenum; probably responsible for the translocation of the substrate across the membrane.                                                                           | W, Mo                     |

| Gene ID  | Location   | BacMet ID | Gene                  | Description                                                                                                                                                                                                                                                                                                                                                                                                          | Resistance to Heavy Metal |
|----------|------------|-----------|-----------------------|----------------------------------------------------------------------------------------------------------------------------------------------------------------------------------------------------------------------------------------------------------------------------------------------------------------------------------------------------------------------------------------------------------------------|---------------------------|
| gene1792 | Scaffold4  | BAC0253   | <i>mntR</i>           | Manganese transport regulator <i>mntR</i> ; In the presence of manganese, represses expression of <i>mntH</i> and <i>mntS</i> . Up-regulates expression of <i>mntP</i>                                                                                                                                                                                                                                               | Mn, Mg                    |
| gene1829 | Scaffold4  | BAC0540   | <i>nfsA</i>           | A major oxygen-insensitive nitroreductase of <i>Escherichia coli</i> , is a flavoprotein that is able to reduce chromate to less soluble and less toxic Cr (III). Reduction of nitroaromatic compounds using NADH. Reduces nitrofurazone by a ping-pong bi-bi mechanism possibly to generate a two-electron transfer product. Major component of the oxygen-insensitive nitroreductase activity in <i>E. coli</i> .  | Cr                        |
| gene1927 | Scaffold5  | BAC0181   | <i>glpF</i>           | Glycerol uptake facilitator protein <i>GlpF</i> ; Transporter of glycerol across the cytoplasmic membrane, with limited permeability to water and small uncharged compounds such as polyols                                                                                                                                                                                                                          | As, Sb                    |
| gene2076 | Scaffold5  | BAC0312   | <i>pitA</i>           | Low-affinity inorganic phosphate transporter 1, <i>PitA</i> ; Can also transport arsenate                                                                                                                                                                                                                                                                                                                            | Zn, Te                    |
| gene2082 | Scaffold5  | BAC0272   | <i>nikC</i>           | Nickel transport system permease protein <i>NikC</i> ; Transmembrane protein; Involved in a nickel transport system, probably translocates nickel through the bacterial inner membrane. Part of the <i>Nik</i> operon ( <i>NikABCDE</i> )                                                                                                                                                                            | Ni                        |
| gene2083 | Scaffold5  | BAC0271   | <i>nikB</i>           | Nickel transport system permease protein <i>NikB</i> ; Transmembrane protein; Involved in a nickel transport system, probably translocates nickel through the bacterial inner membrane. Part of the <i>Nik</i> operon ( <i>NikABCDE</i> )                                                                                                                                                                            | Ni                        |
| gene2310 | Scaffold6  | BAC0469   | <i>zupT/ygiE</i>      | Zinc transporter <i>ZupT</i> ; Mediates zinc uptake. May also transport other divalent cations such as copper and cadmium ions.                                                                                                                                                                                                                                                                                      | Zn, Fe, Co, Ni, Cu, Cd    |
| gene2343 | Scaffold6  | BAC0181   | <i>glpF</i>           | Glycerol uptake facilitator protein <i>GlpF</i> ; Transporter of glycerol across the cytoplasmic membrane, with limited permeability to water and small uncharged compounds such as polyols                                                                                                                                                                                                                          | As, Sb                    |
| gene2569 | Scaffold7  | BAC0166   | <i>fetB/ybbM</i>      | <i>FetB/YbbM</i> is a membrane protein. <i>FetAB</i> allows for increased resistance to oxidative stress in the presence of iron                                                                                                                                                                                                                                                                                     | Fe                        |
| gene2573 | Scaffold7  | BAC0105   | <i>cueR/ybbI</i>      | Regulates the transcription of the <i>copA</i> and <i>cueO</i> genes. It detects cytoplasmic copper stress and activates transcription in response to increasing copper concentrations. <i>CueR</i> is a direct regulator of <i>copZA</i> transcription that mediates copper induction                                                                                                                               | Cu                        |
| gene2574 | Scaffold7  | BAC0625   | <i>copA</i>           | Copper resistance protein A. Required for the copper-inducible expression of copper resistance; part of the copper resistance determinant system.                                                                                                                                                                                                                                                                    | Cu                        |
| gene2924 | Scaffold8  | BAC0113   | <i>cutA</i>           | Divalent-cation tolerance protein <i>CutA</i> ; Involved in resistance toward heavy metals                                                                                                                                                                                                                                                                                                                           | Cu                        |
| gene2985 | Scaffold8  | BAC0371   | <i>soxS</i>           | Regulatory protein <i>SoxS</i> ; Increases the Zn uptake system <i>znuACB</i> ; Transcriptional activator of the superoxide response regulon of <i>E. coli</i> that includes at least 10 genes such as <i>sodA</i> , <i>nfo</i> , <i>zwf</i> and <i>micF</i> . Binds the DNA sequence 5'-GCACN7CAA-3'. It also facilitates the subsequent binding of RNA polymerase to the <i>micF</i> and the <i>nfo</i> promoters. | Zn                        |
| gene3013 | Scaffold8  | BAC0470   | <i>zur/yjbK</i>       | Zinc uptake regulation protein <i>zur</i> ; Acts as a negative controlling element, employing $Zn^{2+}$ as a cofactor to bind the operator of the repressed genes ( <i>znuACB</i> ). Zinc uptake regulation protein.                                                                                                                                                                                                 | Zn                        |
| gene3288 | Scaffold10 | BAC0049   | <i>bhsA/ycfR/comC</i> | Seems to be involved in the regulation of biofilm formation. May decrease biofilm formation by repressing cell-cell interaction and cell surface interaction                                                                                                                                                                                                                                                         | Cu                        |

| Gene ID  | Location   | BacMet ID | Gene             | Description                                                                                                                                                                                                                                                                                                         | Resistance to Heavy Metal |
|----------|------------|-----------|------------------|---------------------------------------------------------------------------------------------------------------------------------------------------------------------------------------------------------------------------------------------------------------------------------------------------------------------|---------------------------|
| gene3700 | Scaffold12 | BAC0334   | <i>robA</i>      | Right origin-binding protein RobA; Organic solvent tolerance by robA is dependent on soxRS; Rob acts as a transcriptional activator. It can confer resistance to antibiotics such as tetracycline, chloramphenicol, phosphomycin, kanamycin, novomycin etc.                                                         | Ag, Hg, Cd                |
| gene3751 | Scaffold13 | BAC0644   | <i>corD</i>      | mutations in apaG/corD give a phenotype of low-level Co2+ resistance. They also decrease Mg2+ efflux but not influx via the CorA Mg2+ transport system.                                                                                                                                                             | Co, Mg                    |
| gene3846 | Scaffold14 | BAC0251   | <i>mntH/yfeP</i> | Divalent metal cation transporter MntH; H+-stimulated, divalent metal cation uptake system. Involved in manganese and iron uptake. Can also transport cadmium, cobalt, zinc and to a lesser extent nickel and copper. Involved in response to reactive oxygen.                                                      | Mn, Fe, Cd, Co, Zn        |
| gene3990 | Scaffold15 | BAC0087   | <i>mgtA</i>      | Magnesium-transporting ATPase, P-type 1; Mediates magnesium influx to the cytosol.                                                                                                                                                                                                                                  | Co, Mg                    |
| gene4069 | Scaffold16 | BAC0307   | <i>pcoE</i>      | Copper-binding protein PcoE; lies distal, downstream from the regulatory genes (gene order in the operon- pcoABCDRSE); Required for the copper-inducible Expression of copper resistance. Activated by the two-component regulatory system CusS/CusR; part of the copper resistance determinant system (pcoABCDRSE) | Cu, Ag                    |
| gene4070 | Scaffold16 | BAC0309   | <i>pcoS</i>      | Sensor protein PcoS; member of a two-component regulatory system PcoS/PcoR. Activate PcoR by phosphorylation; part of the copper resistance determinant system (pcoABCDRSE)                                                                                                                                         | Cu                        |
| gene4071 | Scaffold16 | BAC0308   | <i>pcoR</i>      | Transcriptional regulatory protein PcoR; member of a two-component regulatory system pcoS/pcoR. Involved in the activation of copper resistance gene operon pcoABCD by binding to a specific site on the cop operon promoter (copper box). part of the copper resistance determinant system (pcoABCDRSE)            | Cu                        |
| gene4072 | Scaffold16 | BAC0306   | <i>pcoD</i>      | Copper resistance protein D; Required for the copper-inducible expression of copper resistance; part of the copper resistance determinant system (pcoABCDRSE)                                                                                                                                                       | Cu                        |
| gene4073 | Scaffold16 | BAC0305   | <i>pcoC</i>      | Copper resistance protein PcoC; required for the copper-inducible expression of copper resistance; located in periplasm; part of the copper resistance determinant system (pcoABCDRSE)                                                                                                                              | Cu                        |
| gene4074 | Scaffold16 | BAC0304   | <i>pcoB</i>      | Copper resistance protein PcoB; required for the copper-inducible expression of copper resistance; located in cell outer membrane; it's peripheral membrane protein                                                                                                                                                 | Cu                        |
| gene4075 | Scaffold16 | BAC0303   | <i>pcoA</i>      | Copper resistance protein PcoA; required for the copper-inducible expression of copper resistance. May have oxidase activity; part of the copper resistance determinant system (pcoABCDRSE)                                                                                                                         | Cu                        |
| gene4079 | Scaffold16 | BAC0346   | <i>silP</i>      | Silver exporting P-type ATPase silP; Component of the sil cation-efflux system that confers resistance to silver; silP can participate in resistance to Ag+ individually; located in cell membrane.                                                                                                                 | Ag                        |
| gene4081 | Scaffold16 | BAC0107   | <i>cusA/ybdE</i> | Part of a cation efflux system (CusA, CusB, CusC and CusF) that mediates resistance to copper and silver; located in cell inner membrane; Belongs to the AcrB/AcrD/AcrF family                                                                                                                                      | Cu, Ag                    |
| gene4082 | Scaffold16 | BAC0342   | <i>silB</i>      | SilB, a membrane fusion protein that brings together the inner and outer membranes of Gram-negative bacteria; Component of the sil cation-efflux system (silABC) that confers resistance to silver                                                                                                                  | Ag                        |

| Gene ID  | Location   | BacMet ID | Gene             | Description                                                                                                                                                                                                                                                                                                                      | Resistance to Heavy Metal |
|----------|------------|-----------|------------------|----------------------------------------------------------------------------------------------------------------------------------------------------------------------------------------------------------------------------------------------------------------------------------------------------------------------------------|---------------------------|
| gene4083 | Scaffold16 | BAC0345   | <i>silF</i>      | Silver efflux system periplasmic chaperone; It is a small gene resides in between SilC and SilB of SilCFBA(ORF105)P operon; It carries Ag <sup>+</sup> from its periplasmic site of release by SilP to the periplasmic uptake site of SilA, as part of the SilCBA complex                                                        | Ag                        |
| gene4084 | Scaffold16 | BAC0343   | <i>silC</i>      | SilC is an outer membrane lipoprotein; Component of the sil cation-efflux system (silABC) that confers resistance to silver                                                                                                                                                                                                      | Ag                        |
| gene4085 | Scaffold16 | BAC0111   | <i>cusR/ylcA</i> | Member of the two-component regulatory system CusS/CusR. Activates the Expression of cusCFBA and plasmid pRJ1004 gene <i>pcoE</i> in response to increasing levels of copper ions, and probably silver ions. Can also increase the basal-level Expression of copper resistance gene operon <i>pcoABCD</i> ; located in cytoplasm | Cu, Ag                    |
| gene4086 | Scaffold16 | BAC0348   | <i>silS</i>      | <i>silS</i> encodes a membrane sensor kinase; Component of the sil cation-efflux system that confers resistance to silver. Probable member of a two-component regulatory system SilS/SilR. May activate SilR by phosphorylation                                                                                                  | Ag                        |
| gene4087 | Scaffold16 | BAC0344   | <i>silE</i>      | Component of the sil cation-efflux system that confers resistance to silver; it also can participate in resistance to Ag <sup>+</sup> individually                                                                                                                                                                               | Ag                        |
| gene4166 | Scaffold17 | BAC0318   | <i>pstS</i>      | A periplasmic phosphate binding protein; Part of the ABC transporter complex PstSACB involved in phosphate import.                                                                                                                                                                                                               | As                        |
| gene4167 | Scaffold17 | BAC0317   | <i>pstC</i>      | An integral membrane permease protein; Part of the binding-protein-dependent transport system for phosphate; probably responsible for the translocation of the substrate across the membrane.                                                                                                                                    | As                        |
| gene4168 | Scaffold17 | BAC0315   | <i>pstA</i>      | An integral membrane protein. Part of the binding-protein-dependent transport system for phosphate; probably responsible for the translocation of the substrate across the membrane.                                                                                                                                             | As                        |
| gene4169 | Scaffold17 | BAC0316   | <i>pstB</i>      | Phosphate transporting ATPase; Part of the ABC transporter complex PstSACB involved in phosphate import. Responsible for energy coupling to the transport system.                                                                                                                                                                | As                        |
| gene4176 | Scaffold17 | BAC0541   | <i>yieF</i>      | A chromate reductase. Reduces chromate (Cr (VI)) to Cr (III)                                                                                                                                                                                                                                                                     | Cr, V, Mo                 |
| gene4238 | Scaffold18 | BAC0136   | <i>dsbA</i>      | Disulfide oxidoreductase; Required for disulfide bond formation in some periplasmic proteins such as PhoA or OmpA. Acts by transferring its disulfide bond to other proteins and is reduced in the process. DsbA is reoxidized by DsbB. It is required for pilus biogenesis                                                      | Cd, Zn, Hg                |
| gene4288 | Scaffold18 | BAC0368   | <i>sodA</i>      | Mn-dependent superoxide dismutase; Destroys superoxide anion radicals which are normally produced within the cells and which are toxic to biological systems.                                                                                                                                                                    | Se                        |
| gene4544 | Scaffold21 | BAC0086   | <i>corA</i>      | Mediates influx of magnesium ions. Can also mediate cobalt and manganese uptake, albeit only at extracellular concentrations that are toxic to the cell. Does not transport iron.                                                                                                                                                | Mg, Co, Ni, Mn            |
| gene4833 | Scaffold27 | BAC0589   | <i>arsR</i>      | Transcriptional repressor for the <i>ars</i> operon. ArsR is a trans-acting regulatory protein which controls its own expression. The repressive effect of ArsR is alleviated by oxyions of +III oxidation state of arsenic, antimony, and bismuth, as well as arsenate (As(V)).                                                 | As, Sb, Bi                |
| gene4834 | Scaffold27 | BAC0033   | <i>arsD</i>      | An arsenic metallochaperone for an arsenic detoxification pump                                                                                                                                                                                                                                                                   | As                        |

| Gene ID  | Location   | BacMet ID | Gene             | Description                                                                                                                                                                                                                                                                                                                                  | Resistance to Heavy Metal |
|----------|------------|-----------|------------------|----------------------------------------------------------------------------------------------------------------------------------------------------------------------------------------------------------------------------------------------------------------------------------------------------------------------------------------------|---------------------------|
| gene4835 | Scaffold27 | BAC0030   | <i>arsA</i>      | Anion-transporting ATPase; Determinants of a membrane-associated oxyanion-stimulated ATPase protein; energizes the arsenite efflux pump by ATP hydrolysis; Catalyzes the extrusion of the oxyanions arsenite, antimonite and arsenate. Maintenance of a low intracellular concentration of oxyanion produces resistance to the toxic agents. | As, Sb                    |
| gene4836 | Scaffold27 | BAC0031   | <i>arsB</i>      | Arsenic pump membrane protein, located in cell inner membrane. Involved in arsenite and antimonite resistance. Thought to form a channel of an arsenite pump.                                                                                                                                                                                | As, Sb                    |
| gene4837 | Scaffold27 | BAC0582   | <i>arsC</i>      | Reduction of arsenate [As(V)] to arsenite [As (III)]. This protein expands the substrate specificity of ArsAB pump which can extrude arsenite and antimonite to allow for arsenate pumping and resistance.                                                                                                                                   | As, Sb                    |
| gene4852 | Scaffold27 | BAC0163   | <i>fecD</i>      | Fe(3+) dicitrate transport system permease protein FecD; Part of the binding-protein-dependent transport system for citrate-dependent Fe3+. Probably responsible for the translocation of the substrate across the membrane.                                                                                                                 | Ni, Co                    |
| gene4864 | Scaffold28 | BAC0467   | <i>zraR/hydH</i> | Transcriptional regulatory protein ZraR; Member of the two-component regulatory system ZraS/ZraR. When activated by ZraS it acts in conjunction with sigma-54 to regulate the Expression of zraP. Positively autoregulates the Expression of the zraSR operon.                                                                               | Zn                        |
| gene4904 | Scaffold29 | BAC0643   | <i>corB</i>      | Magnesium-transporting ATPase, P-type 1; Mediates magnesium influx to the cytosol.                                                                                                                                                                                                                                                           | Co, Mg                    |
| gene4980 | Scaffold31 | BAC0462   | <i>zntR/yhdM</i> | Zinc-responsive transcriptional regulator zntR; regulates the zntA                                                                                                                                                                                                                                                                           | Zn                        |
| gene5020 | Scaffold33 | BAC0111   | <i>cusR/ylcA</i> | Member of the two-component regulatory system CusS/CusR. Activates the Expression of cusCFBA and plasmid pRJ1004 gene pcoE in response to increasing levels of copper ions, and probably silver ions. Can also increase the basal-level Expression of copper resistance gene operon pcoABCD; located in cytoplasm                            | Cu, Ag                    |
| gene5024 | Scaffold33 | BAC0107   | <i>cusA/ybdE</i> | Part of a cation efflux system (CusA, CusB, CusC and CusF) that mediates resistance to copper and silver; located in cell inner membrane; Belongs to the AcrB/AcrD/AcrF family                                                                                                                                                               | Cu, Ag                    |

Note: BacMet, the metal resistance genes database (<http://bacmet.biomedicine.gu.se/index.html>).
